# Supplementary material for: ESGO/ISUOG/IOTA/ESGE Consensus Statement on pre-operative diagnosis of ovarian tumors
Source: PubMed Central journal article supplement — Int J Gynecol Cancer. 2021 Jun 10;31(7):961–82. doi: 10.1136/ijgc-2021-002565 (PMC8273689; doi:10.1136/ijgc-2021-002565), 2021-06-10
Supplement: ijgc-2021-002565supp002.pdf [file ijgc-2021-002565supp002.pdf]

**Table 3** Levels of evidence and grades of statement used in this Consensus Statement

| Levels of evidence                                                                                                                                                                                                                                                                                                                                                                                                                                                                                                                                                                        |                                                                                                                                                     |                                                                                                                                                                                                                                                                       |
|-------------------------------------------------------------------------------------------------------------------------------------------------------------------------------------------------------------------------------------------------------------------------------------------------------------------------------------------------------------------------------------------------------------------------------------------------------------------------------------------------------------------------------------------------------------------------------------------|-----------------------------------------------------------------------------------------------------------------------------------------------------|-----------------------------------------------------------------------------------------------------------------------------------------------------------------------------------------------------------------------------------------------------------------------|
| 1a                                                                                                                                                                                                                                                                                                                                                                                                                                                                                                                                                                                        | Systematic review (with homogeneity) of Level-1 diagnostic studies; or clinical decision rule with Level-1b studies from different clinical centers |                                                                                                                                                                                                                                                                       |
| 1b                                                                                                                                                                                                                                                                                                                                                                                                                                                                                                                                                                                        | Validating cohort study with good reference standards; or clinical decision rule tested within one clinical center                                  |                                                                                                                                                                                                                                                                       |
| 1c                                                                                                                                                                                                                                                                                                                                                                                                                                                                                                                                                                                        | Absolute SpPins and SnNouts*                                                                                                                        |                                                                                                                                                                                                                                                                       |
| 2a                                                                                                                                                                                                                                                                                                                                                                                                                                                                                                                                                                                        | Systematic review (with homogeneity) of Level > 2 diagnostic studies                                                                                |                                                                                                                                                                                                                                                                       |
| 2b                                                                                                                                                                                                                                                                                                                                                                                                                                                                                                                                                                                        | Exploratory cohort study with good reference standards; or clinical decision rule after derivation, or validated only on split-sample or databases  |                                                                                                                                                                                                                                                                       |
| 3a                                                                                                                                                                                                                                                                                                                                                                                                                                                                                                                                                                                        | Systematic review (with homogeneity) of studies Level $\geq$ 3b                                                                                     |                                                                                                                                                                                                                                                                       |
| 3b                                                                                                                                                                                                                                                                                                                                                                                                                                                                                                                                                                                        | Non-consecutive study; or without consistently applied reference standards                                                                          |                                                                                                                                                                                                                                                                       |
| 4                                                                                                                                                                                                                                                                                                                                                                                                                                                                                                                                                                                         | Case-control study, poor or non-independent reference standard                                                                                      |                                                                                                                                                                                                                                                                       |
| 5                                                                                                                                                                                                                                                                                                                                                                                                                                                                                                                                                                                         | Expert opinion without explicit critical appraisal, or based on physiology, bench research or 'first principles'                                    |                                                                                                                                                                                                                                                                       |
| Grades of statement                                                                                                                                                                                                                                                                                                                                                                                                                                                                                                                                                                       |                                                                                                                                                     |                                                                                                                                                                                                                                                                       |
| Code                                                                                                                                                                                                                                                                                                                                                                                                                                                                                                                                                                                      | Quality of evidence                                                                                                                                 | Definition                                                                                                                                                                                                                                                            |
| A                                                                                                                                                                                                                                                                                                                                                                                                                                                                                                                                                                                         | High                                                                                                                                                | Further research is very unlikely to change our confidence in the estimate of effect. <ul style="list-style-type: none"> <li>• Several high-quality studies with consistent results</li> <li>• In special cases: one large, high-quality multicenter trial</li> </ul> |
| B                                                                                                                                                                                                                                                                                                                                                                                                                                                                                                                                                                                         | Moderate                                                                                                                                            | Further research is likely to have an important impact on our confidence in the estimate of effect and may change the estimate. <ul style="list-style-type: none"> <li>• One high-quality study</li> <li>• Several studies with some limitations</li> </ul>           |
| C                                                                                                                                                                                                                                                                                                                                                                                                                                                                                                                                                                                         | Low                                                                                                                                                 | Further research is very likely to have an important impact on our confidence in the estimate of effect and is likely to change the estimate. <ul style="list-style-type: none"> <li>• One or more studies with severe limitations</li> </ul>                         |
| D                                                                                                                                                                                                                                                                                                                                                                                                                                                                                                                                                                                         | Very low                                                                                                                                            | Any estimate of effect is very uncertain. <ul style="list-style-type: none"> <li>• Expert opinion</li> <li>• No direct research evidence</li> <li>• One or more studies with very severe limitations</li> </ul>                                                       |
| <p>Note: A minus sign '-' may be added to denote evidence that fails to provide a conclusive answer because it is <i>either</i> (a) a single result with a wide confidence interval; or (b) a systematic review with considerable heterogeneity. Such evidence is inconclusive, and therefore can only generate Grade D recommendations. *'Absolute SpPin' is a diagnostic finding whose specificity is so high that a positive result rules in the diagnosis; 'Absolute SnNout' is a diagnostic finding whose sensitivity is so high that a negative result rules out the diagnosis.</p> |                                                                                                                                                     |                                                                                                                                                                                                                                                                       |
